# Supplementary material for: On-surface polymerization reactions of dibrominated hexaphenylbenzene influenced by densely packed self-assembly
Source: Royal Society of Chemistry journal article supplement (doi:10.1039/d4cp00696h), 2024-01-01
Supplement: d4cp00696h1.pdf [file d4cp00696h1.pdf]

Supplementary information for

**On-Surface Polymerization Reactions of Dibrominated Hexaphenylbenzene**

**Influenced by Densely Packed Self-assembly**

*Hiroaki Ooe, and Takashi Yokoyama\**

Faculty of Science, Yokohama city university, 22-2 Seto, Kanazawa-ku, Yokohama  
236-0027, Japan

**Author Information**

Takashi Yokoyama (Email:tyoko@yokohama-cu.ac.jp)

**Contents**

Figure S1. Substrate temperature dependence of the self-assembled structure of HPB polymer chains on Au(111).

Figure S2. Length distributions of HPB polymer chains.

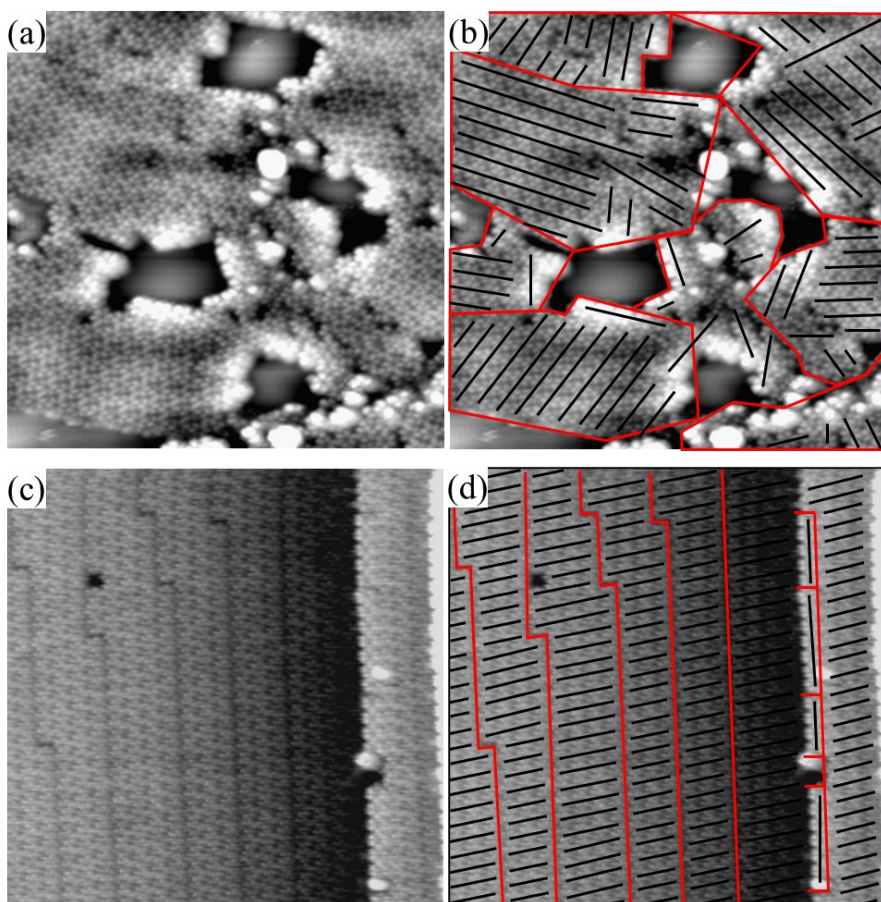

Figure S1. Substrate temperature dependence of the self-assembled structure of HPB polymer chains. (a,b) STM image ( $30\text{ nm} \times 30\text{ nm}$ ,  $V_s = -3.0\text{ V}$ , and  $I_t = 20\text{ pA}$ ) taken after deposition of Br<sub>2</sub>-HPB onto hot Au(111) held at around 200 °C. The HPB polymer chains form small domains, and the orientation of HPB polymer chains are randomly distributed for the different domains. (c,d) STM image ( $30\text{ nm} \times 30\text{ nm}$ ,  $V_s = -3.0\text{ V}$ , and  $I_t = 20\text{ pA}$ ) taken after deposition of Br<sub>2</sub>-HPB onto room-temperature Au(111) and subsequent annealing at 200 °C for 20 h. The HPB polymer chains are self-assembled into the long-range ordered straight rows. The orientations of each HPB polymer chain and the domain boundaries between straight rows are indicated by black and red lines, respectively. For (a-d), intact Br<sub>2</sub>-HPB precursors has no longer been observed.

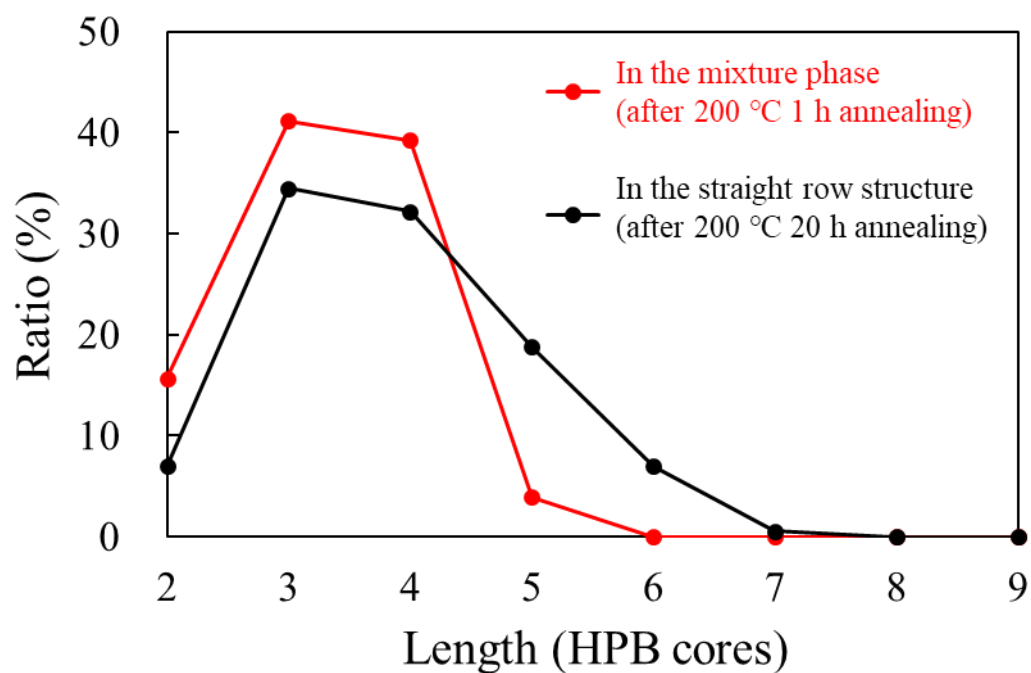

Figure S2. Length distributions of HPB polymer chains in (a) the mixture phase after 200 °C 1 h annealing and (b) the self-assembled straight rows after 200 °C 20 h annealing. Although the ratio of longer chains (more than 5 HPB cores) increased slightly by further annealing, the most observed length (3-4 HPB cores) is identical, indicating minimal influence of annealing time on chain length.
